# Supplementary material for: Tellurium as a high-performance elemental thermoelectric
Source: PubMed Central journal article supplement (PMC4729895; doi:10.1038/ncomms10287), 2016-01-11
Supplement: ncomms10287-s1.pdf [file ncomms10287-s1.pdf]

---

Supplementary Figures

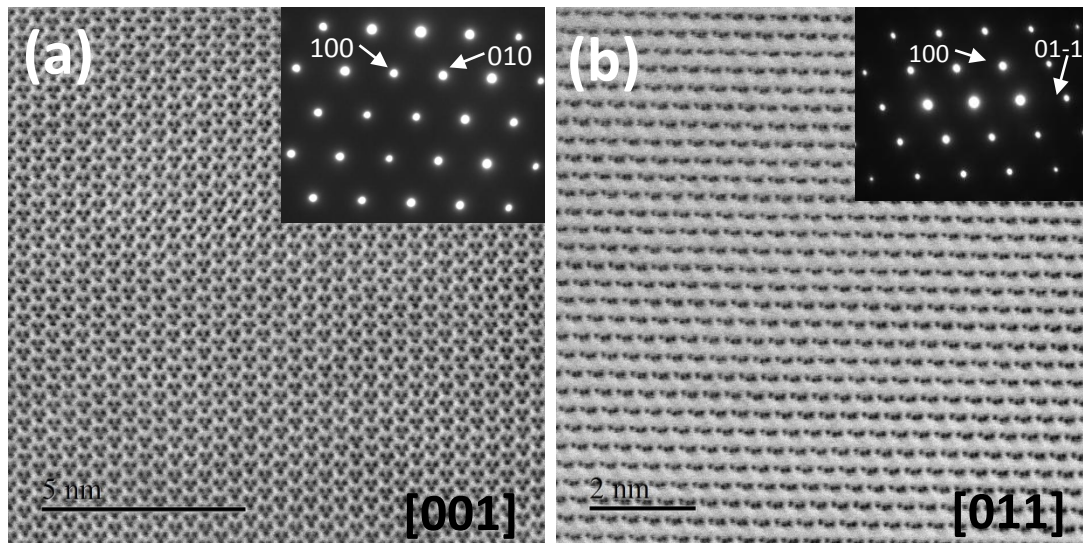

**Supplementary Figure 1. Microstructure of tellurium.** STEM images taken along [001] direction (a) and [011] direction (b) for the sample with the highest  $zT$ . Scale bar, 5 nm (a), 2 nm (b).

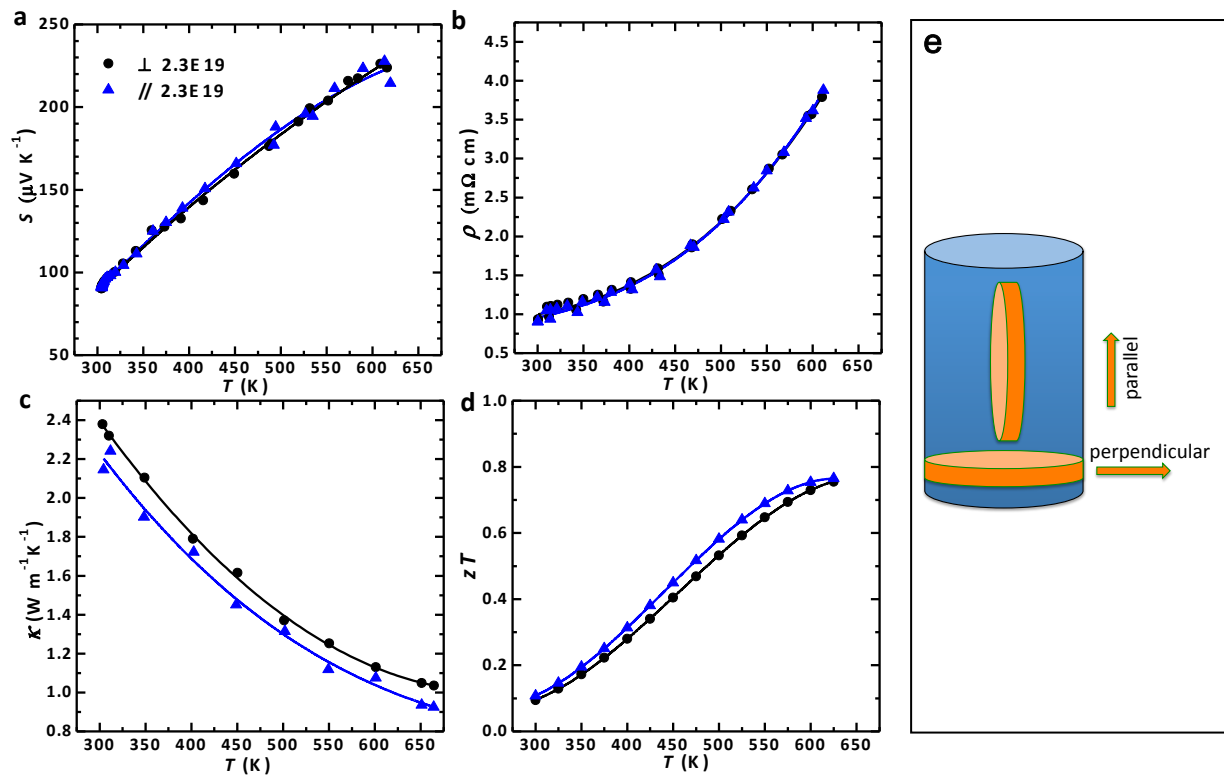

**Supplementary Figure 2. Isotropic transport properties for tellurium.** Temperature dependent Seebeck coefficient (a), resistivity (b), total thermal conductivity (c) and  $zT$  (d) in the directions parallel (blue) and perpendicular (black) to that of the pressure applied during the uniaxial hot press (e).

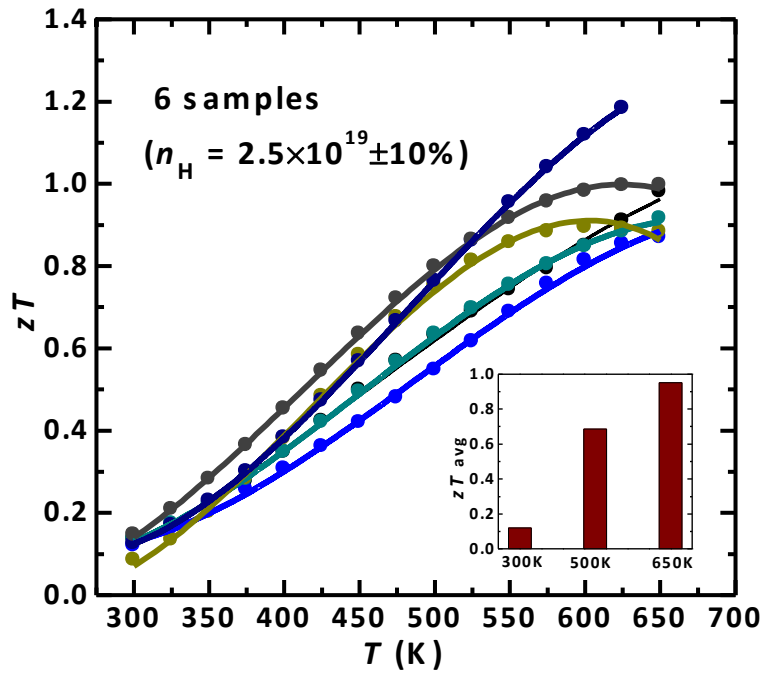

**Supplementary Figure 3. Reproducibility of the thermoelectric performance.** Temperature dependent  $zT$  for six samples with a carrier concentration of  $2.5 \times 10^{19} \text{ cm}^{-3} \pm 10\%$ . The peak  $zT$  ranges within of 0.8~1.2 and leads to an average value of 1.0 at 650K (inset).

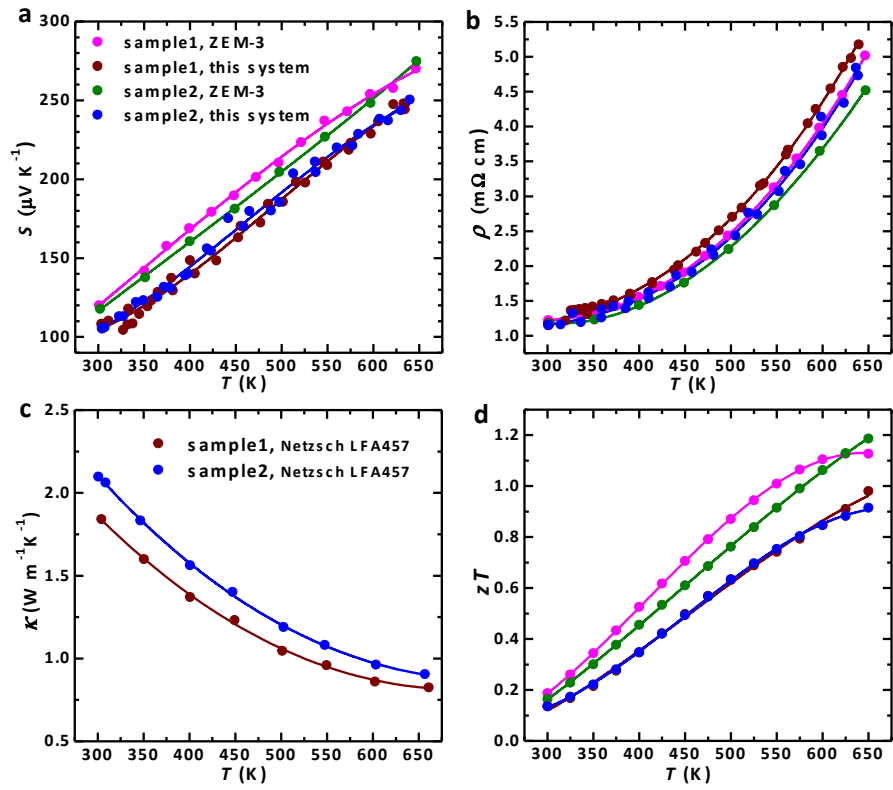

**Supplementary Figure 4. Comparable measurements.** Temperature dependent Seebeck coefficient (a), resistivity (b), total thermal conductivity (c) and  $zT$  (d) for two samples, measured by our system and ZEM-3.

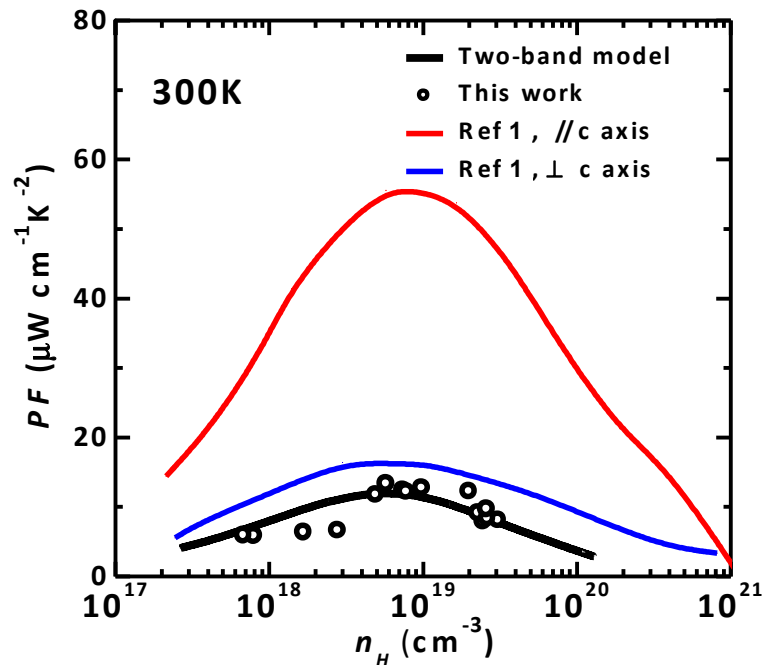

**Supplementary Figure 5. Comparison between measured and calculated power factor.**

Power factor ( $PF$ ) versus carrier concentration for tellurium. The blue and red curves are from the ab initio calculation<sup>1</sup> for directions along and perpendicular to the  $c$  axis, respectively. Our model prediction (curve) and measurement (circles) for polycrystalline tellurium are shown in black.

---

## Supplementary Reference

1. Peng H, Kioussis N, Snyder GJ. Elemental tellurium as a chiral p-type thermoelectric material. *Phys Rev B* **89**, 195206 (2014).
